# Supplementary material for: Children with lower language skill engage additional brain mechanisms in both hemispheres during sentence comprehension
Source: Research Square preprint supplement (doi:10.21203/rs.3.rs-7871439/v1), 2025-10-21
Supplement: Supplementary file 1 [file 710ab563e4024e2b07828835.docx]

**Supplementary materials - Brain-behavior correlations between morphological processing and language abilities in frontotemporal language areas using multivoxel pattern analysis**

Mues, M., Mathur, A., Booth, J.R.

| **Table S1. Full overview of** **negative correlations between whole brain accuracy matrix and Sentence Repetition surviving TFCE corrections** | | | | | |
| --- | --- | --- | --- | --- | --- |
| *Location* | *Number of voxels (k)* | *z-value* | *MNI coordinates* | | |
|  |  |  | x | y | z |
| L Angular Gyrus | 2 | -2,823 | -44 | -66 | 42 |
| L Angular Gyrus | 2 | -2,823 | -48 | -64 | 42 |
| L Angular Gyrus | 2 | -2,823 | -42 | -62 | 42 |
| L Angular Gyrus | 5 | -2,823 | -42 | -60 | 46 |
| L Angular Gyrus | 1 | -2,823 | -46 | -60 | 46 |
| L Angular Gyrus | 1 | -2,380 | -38 | -68 | 42 |
| L Angular Gyrus | 1 | -1,809 | -42 | -58 | 40 |
| L Calcarine Gyrus | 1 | -2,340 | 2 | -78 | 16 |
| L Calcarine Gyrus | 1 | -2,340 | 4 | -86 | 18 |
| L Calcarine Gyrus | 2 | -2,340 | 4 | -82 | 20 |
| L Calcarine Gyrus | 6 | -2,340 | 2 | -70 | 24 |
| L IFG (p. Opercularis) | 1 | -2,055 | -50 | 10 | 28 |
| L IFG (p. Opercularis) | 4 | -2,055 | -50 | 16 | 40 |
| L IFG (p. Opercularis) | 1 | -1,987 | -46 | 4 | 34 |
| L IFG (p. Opercularis) | 1 | -1,867 | -54 | 14 | 40 |
| L IFG (p. Orbitalis) | 1 | -2,055 | -36 | 28 | 0 |
| L IFG (p. Orbitalis) | 3 | -2,055 | -38 | 32 | 2 |
| L IFG (p. Orbitalis) | 3 | -1,836 | -32 | 32 | 2 |
| L IFG (p. Triangularis) | 6 | -2,055 | -50 | 32 | 6 |
| L IFG (p. Triangularis) | 3 | -2,055 | -34 | 36 | 6 |
| L IFG (p. Triangularis) | 1 | -2,055 | -50 | 40 | 6 |
| L IFG (p. Triangularis) | 5 | -2,055 | -54 | 28 | 8 |
| L IFG (p. Triangularis) | 2 | -2,055 | -54 | 22 | 10 |
| L IFG (p. Triangularis) | 2 | -2,055 | -36 | 28 | 10 |
| L IFG (p. Triangularis) | 1 | -2,055 | -34 | 32 | 10 |
| L IFG (p. Triangularis) | 2 | -2,055 | -52 | 32 | 10 |
| L IFG (p. Triangularis) | 5 | -2,055 | -38 | 36 | 10 |
| L IFG (p. Triangularis) | 1 | -2,055 | -44 | 44 | 10 |
| L IFG (p. Triangularis) | 3 | -2,055 | -42 | 30 | 12 |
| L IFG (p. Triangularis) | 2 | -2,055 | -46 | 34 | 12 |
| L IFG (p. Triangularis) | 1 | -2,055 | -48 | 38 | 12 |
| L IFG (p. Triangularis) | 7 | -2,055 | -48 | 18 | 14 |
| L IFG (p. Triangularis) | 2 | -2,055 | -52 | 28 | 16 |
| L IFG (p. Triangularis) | 2 | -2,055 | -48 | 30 | 16 |
| L IFG (p. Triangularis) | 2 | -2,055 | -36 | 32 | 16 |
| L IFG (p. Triangularis) | 7 | -2,055 | -34 | 26 | 18 |
| L IFG (p. Triangularis) | 3 | -2,055 | -46 | 36 | 18 |
| L IFG (p. Triangularis) | 1 | -2,055 | -42 | 22 | 20 |
| L IFG (p. Triangularis) | 1 | -2,055 | -44 | 32 | 20 |
| L IFG (p. Triangularis) | 16 | -2,055 | -36 | 38 | 20 |
| L IFG (p. Triangularis) | 4 | -2,055 | -44 | 20 | 22 |
| L IFG (p. Triangularis) | 1 | -2,055 | -52 | 32 | 22 |
| L IFG (p. Triangularis) | 4 | -2,055 | -34 | 24 | 24 |
| L IFG (p. Triangularis) | 5 | -2,055 | -50 | 24 | 24 |
| L IFG (p. Triangularis) | 4 | -2,055 | -42 | 18 | 26 |
| L IFG (p. Triangularis) | 1 | -2,055 | -48 | 32 | 26 |
| L IFG (p. Triangularis) | 2 | -2,055 | -42 | 12 | 28 |
| L IFG (p. Triangularis) | 1 | -2,055 | -36 | 22 | 28 |
| L IFG (p. Triangularis) | 4 | -2,055 | -44 | 8 | 30 |
| L IFG (p. Triangularis) | 1 | -2,055 | -38 | 12 | 32 |
| L IFG (p. Triangularis) | 1 | -2,055 | -44 | 20 | 32 |
| L IFG (p. Triangularis) | 7 | -2,055 | -36 | 24 | 32 |
| L IFG (p. Triangularis) | 1 | -2,055 | -40 | 14 | 34 |
| L IFG (p. Triangularis) | 3 | -2,055 | -44 | 14 | 36 |
| L IFG (p. Triangularis) | 3 | -2,055 | -52 | 18 | 36 |
| L IFG (p. Triangularis) | 1 | -2,055 | -48 | 20 | 36 |
| L IFG (p. Triangularis) | 1 | -1,987 | -52 | 26 | 10 |
| L IFG (p. Triangularis) | 1 | -1,701 | -54 | 24 | 14 |
| L Inferior Parietal Lobule | 2 | -2,140 | -38 | -52 | 44 |
| L Inferior Parietal Lobule | 1 | -2,140 | -44 | -52 | 44 |
| L Inferior Parietal Lobule | 1 | -2,140 | -28 | -56 | 48 |
| L Inferior Parietal Lobule | 4 | -2,140 | -34 | -54 | 48 |
| L Inferior Parietal Lobule | 1 | -2,140 | -34 | -50 | 50 |
| L Inferior Parietal Lobule | 1 | -2,082 | -28 | -70 | 48 |
| L Inferior Parietal Lobule | 1 | -2,015 | -36 | -60 | 48 |
| L Inferior Parietal Lobule | 1 | -1,809 | -44 | -58 | 44 |
| L Insula Lobe | 3 | -2,055 | -26 | 20 | 18 |
| L Linual Gyrus | 1 | -2,340 | 2 | -76 | 10 |
| L MCC | 1 | -1,698 | -10 | 10 | 38 |
| L Middle Frontal Gyrus | 6 | -2,055 | -32 | 40 | 10 |
| L Middle Frontal Gyrus | 5 | -2,055 | -40 | 44 | 10 |
| L Middle Frontal Gyrus | 1 | -2,055 | -44 | 46 | 16 |
| L Middle Frontal Gyrus | 2 | -2,055 | -40 | 48 | 16 |
| L Middle Frontal Gyrus | 1 | -2,055 | -34 | 50 | 16 |
| L Middle Frontal Gyrus | 2 | -2,055 | -32 | 32 | 26 |
| L Middle Frontal Gyrus | 1 | -2,055 | -34 | 42 | 26 |
| L Middle Frontal Gyrus | 1 | -2,055 | -28 | 38 | 28 |
| L Middle Frontal Gyrus | 1 | -2,055 | -32 | 40 | 28 |
| L Middle Frontal Gyrus | 2 | -2,055 | -44 | 40 | 28 |
| L Middle Frontal Gyrus | 4 | -2,055 | -28 | 32 | 30 |
| L Middle Frontal Gyrus | 1 | -2,055 | -20 | 36 | 30 |
| L Middle Frontal Gyrus | 3 | -2,055 | -28 | 28 | 32 |
| L Middle Frontal Gyrus | 2 | -2,055 | -40 | 40 | 32 |
| L Middle Frontal Gyrus | 1 | -2,055 | -44 | 36 | 34 |
| L Middle Frontal Gyrus | 3 | -2,055 | -34 | 40 | 34 |
| L Middle Frontal Gyrus | 12 | -2,055 | -30 | 46 | 34 |
| L Middle Frontal Gyrus | 1 | -2,055 | -28 | 22 | 36 |
| L Middle Frontal Gyrus | 1 | -2,055 | -42 | 38 | 36 |
| L Middle Frontal Gyrus | 7 | -2,055 | -36 | 30 | 38 |
| L Middle Frontal Gyrus | 2 | -2,055 | -26 | 34 | 38 |
| L Middle Frontal Gyrus | 1 | -2,055 | -32 | 38 | 40 |
| L Middle Frontal Gyrus | 3 | -2,055 | -22 | 20 | 42 |
| L Middle Frontal Gyrus | 2 | -2,055 | -32 | 22 | 42 |
| L Middle Frontal Gyrus | 1 | -2,055 | -22 | 26 | 44 |
| L Middle Frontal Gyrus | 3 | -2,055 | -36 | 32 | 44 |
| L Middle Frontal Gyrus | 1 | -2,055 | -36 | 8 | 46 |
| L Middle Frontal Gyrus | 3 | -2,055 | -44 | 10 | 48 |
| L Middle Frontal Gyrus | 4 | -1,836 | -34 | 36 | 42 |
| L Middle Occipital Gyrus | 1 | -2,082 | -28 | -64 | 40 |
| L Middle Occipital Gyrus | 5 | -2,082 | -28 | -78 | 42 |
| L Middle Occipital Gyrus | 1 | -2,082 | -30 | -60 | 42 |
| L Middle Occipital Gyrus | 1 | -2,082 | -34 | -76 | 44 |
| L Middle Occipital Gyrus | 1 | -2,082 | -24 | -64 | 44 |
| L Middle Temporal Gyrus | 1 | -2,761 | -62 | -38 | -2 |
| L Middle Temporal Gyrus | 1 | -2,153 | -44 | -54 | 4 |
| L Middle Temporal Gyrus | 2 | -2,082 | -52 | -54 | 8 |
| L Middle Temporal Gyrus | 2 | -2,082 | -50 | -56 | 12 |
| L Middle Temporal Gyrus | 1 | -2,082 | -52 | -60 | 14 |
| L Middle Temporal Gyrus | 1 | -2,040 | -44 | -64 | 12 |
| L Middle Temporal Gyrus | 1 | -1,948 | -50 | -72 | 8 |
| L Middle Temporal Gyrus | 1 | -1,920 | -52 | -62 | 10 |
| L Middle Temporal Gyrus | 1 | -1,769 | -50 | -56 | 6 |
| L Postcentral Gyrus | 1 | -2,438 | -40 | -28 | 54 |
| L Postcentral Gyrus | 6 | -2,438 | -46 | -26 | 54 |
| L Postcentral Gyrus | 2 | -2,438 | -52 | -26 | 54 |
| L Postcentral Gyrus | 5 | -2,402 | -52 | -26 | 36 |
| L Postcentral Gyrus | 1 | -1,932 | -44 | -30 | 60 |
| L Postcentral Gyrus | 1 | -1,829 | -36 | -24 | 54 |
| L Precentral Gyrus | 10 | -2,055 | -48 | 4 | 42 |
| L Superior Frontal Gyrus | 1 | -2,566 | -20 | 50 | 34 |
| L Superior Frontal Gyrus | 1 | -2,055 | -20 | 34 | 36 |
| L Superior Frontal Gyrus | 4 | -2,055 | -18 | 38 | 38 |
| L Superior Frontal Gyrus | 1 | -2,055 | -18 | 36 | 42 |
| L Superior Frontal Gyrus | 1 | -1,769 | -12 | 34 | 40 |
| L Superior Medial Gyrus | 5 | -2,055 | -14 | 32 | 34 |
| L Superior Medial Gyrus | 5 | -2,055 | -6 | 32 | 38 |
| L Superior Medial Gyrus | 4 | -2,055 | -10 | 28 | 40 |
| L Superior Occipital Gyrus | 1 | -2,761 | -18 | -80 | 46 |
| L Superior Occipital Gyrus | 6 | -2,662 | -12 | -92 | 14 |
| L Superior Parietal Lobule | 2 | -2,082 | -24 | -72 | 46 |
| L Superior Temporal Gyrus | 2 | -2,641 | -58 | -40 | 26 |
| L SupraMarginal Gyrus | 2 | -3,226 | -60 | -30 | 42 |
| Location not in atlas | 27 | -2,402 | -40 | -28 | 32 |
| Location not in atlas | 3 | -2,402 | -38 | -38 | 36 |
| Location not in atlas | 2 | -2,380 | 28 | -48 | 8 |
| Location not in atlas | 4 | -2,237 | -24 | -76 | 24 |
| Location not in atlas | 1 | -2,153 | -34 | -56 | 8 |
| Location not in atlas | 1 | -2,153 | -44 | -56 | 8 |
| Location not in atlas | 1 | -2,153 | -40 | -52 | 8 |
| Location not in atlas | 4 | -2,153 | -38 | -58 | 10 |
| Location not in atlas | 1 | -2,153 | -38 | -54 | 10 |
| Location not in atlas | 1 | -2,153 | -40 | -54 | 14 |
| Location not in atlas | 2 | -2,140 | -32 | -52 | 42 |
| Location not in atlas | 1 | -2,140 | -26 | -50 | 44 |
| Location not in atlas | 1 | -2,122 | -12 | -48 | 32 |
| Location not in atlas | 1 | -2,082 | -24 | -60 | 46 |
| Location not in atlas | 1 | -2,055 | 36 | -52 | 0 |
| Location not in atlas | 3 | -2,055 | -30 | 34 | 6 |
| Location not in atlas | 1 | -2,055 | -32 | 22 | 20 |
| Location not in atlas | 1 | -2,055 | -28 | 20 | 22 |
| Location not in atlas | 1 | -2,055 | -32 | 20 | 24 |
| Location not in atlas | 3 | -2,055 | -22 | 12 | 26 |
| Location not in atlas | 4 | -2,055 | -12 | 16 | 26 |
| Location not in atlas | 5 | -2,055 | -32 | 16 | 26 |
| Location not in atlas | 1 | -2,055 | -26 | 30 | 26 |
| Location not in atlas | 2 | -2,055 | -12 | 8 | 28 |
| Location not in atlas | 1 | -2,055 | -20 | 8 | 30 |
| Location not in atlas | 1 | -2,055 | -16 | 16 | 30 |
| Location not in atlas | 2 | -2,055 | -30 | 20 | 30 |
| Location not in atlas | 1 | -2,055 | -18 | 6 | 32 |
| Location not in atlas | 1 | -2,055 | -24 | 6 | 32 |
| Location not in atlas | 8 | -2,055 | -22 | 12 | 34 |
| Location not in atlas | 8 | -2,055 | -28 | 12 | 34 |
| Location not in atlas | 1 | -2,055 | -14 | 14 | 36 |
| Location not in atlas | 1 | -2,055 | -16 | 18 | 36 |
| Location not in atlas | 5 | -2,055 | -22 | 26 | 36 |
| Location not in atlas | 8 | -2,055 | -14 | 4 | 38 |
| Location not in atlas | 1 | -2,055 | -28 | 10 | 38 |
| Location not in atlas | 1 | -2,055 | -16 | 22 | 38 |
| Location not in atlas | 10 | -2,055 | -26 | 4 | 40 |
| Location not in atlas | 1 | -2,055 | -18 | 12 | 40 |
| Location not in atlas | 1 | -2,055 | -24 | 12 | 40 |
| Location not in atlas | 2 | -2,055 | -20 | 16 | 40 |
| Location not in atlas | 3 | -2,055 | -14 | 14 | 42 |
| Location not in atlas | 1 | -2,055 | -24 | 10 | 44 |
| Location not in atlas | 3 | -2,040 | 18 | -42 | 38 |
| Location not in atlas | 1 | -1,893 | 24 | -48 | 8 |
| Location not in atlas | 2 | -1,870 | -30 | -72 | 24 |
| Location not in atlas | 1 | -1,793 | -24 | -82 | 24 |
| Location not in atlas | 1 | -1,734 | 18 | -50 | 52 |
| Location not in atlas | 1 | -1,698 | -24 | -70 | 26 |
| Location not in atlas | 1 | -1,680 | -18 | -50 | 44 |
| Location not in atlas | 1 | -1,669 | -10 | 10 | 26 |
| R ACC | 1 | -2,402 | 8 | 46 | 22 |
| R Angular Gyrus | 1 | -2,172 | 30 | -68 | 50 |
| R Angular Gyrus | 1 | -2,122 | 48 | -64 | 44 |
| R Calcarine Gyrus | 2 | -2,380 | 24 | -52 | 10 |
| R Calcarine Gyrus | 1 | -2,340 | 8 | -84 | 8 |
| R Calcarine Gyrus | 6 | -2,340 | 22 | -76 | 12 |
| R Calcarine Gyrus | 1 | -2,340 | 6 | -76 | 12 |
| R Calcarine Gyrus | 3 | -2,340 | 6 | -82 | 14 |
| R Calcarine Gyrus | 11 | -2,340 | 12 | -74 | 14 |
| R Calcarine Gyrus | 1 | -2,340 | 6 | -72 | 14 |
| R Calcarine Gyrus | 1 | -2,340 | 8 | -86 | 18 |
| R Calcarine Gyrus | 2 | -2,340 | 4 | -76 | 18 |
| R Calcarine Gyrus | 2 | -2,340 | 12 | -78 | 20 |
| R Calcarine Gyrus | 1 | -2,340 | 12 | -76 | 24 |
| R Calcarine Gyrus | 1 | -2,340 | 12 | -72 | 24 |
| R Calcarine Gyrus | 1 | -1,754 | 6 | -88 | 16 |
| R Caudate Nucleus | 1 | -1,680 | 8 | 14 | 0 |
| R Cuneus | 2 | -2,340 | 4 | -80 | 24 |
| R Cuneus | 1 | -1,920 | 10 | -70 | 26 |
| R Fusiform Gyrus | 4 | -2,476 | 30 | -54 | 0 |
| R Fusiform Gyrus | 2 | -1,870 | 34 | -48 | -4 |
| R Fusiform Gyrus | 1 | -1,685 | 30 | -40 | -14 |
| R Inferior Temporal Gyrus | 6 | -2,519 | 52 | -10 | -30 |
| R Linual Gyrus | 5 | -2,340 | 16 | -74 | 0 |
| R Linual Gyrus | 8 | -2,340 | 12 | -72 | 0 |
| R Linual Gyrus | 2 | -2,340 | 4 | -76 | 4 |
| R Linual Gyrus | 1 | -2,340 | 4 | -80 | 6 |
| R Linual Gyrus | 1 | -2,055 | 20 | -70 | 2 |
| R Linual Gyrus | 1 | -1,920 | 16 | -68 | 2 |
| R Linual Gyrus | 1 | -1,778 | 12 | -76 | -2 |
| R MCC | 1 | -1,799 | 10 | -40 | 38 |
| R Middle Frontal Gyrus | 1 | -2,391 | 24 | 52 | 28 |
| R Middle Frontal Gyrus | 1 | -2,303 | 46 | 8 | 46 |
| R Middle Frontal Gyrus | 1 | -2,207 | 30 | 56 | 26 |
| R Middle Frontal Gyrus | 1 | -1,647 | 40 | 20 | 50 |
| R PCC | 2 | -2,312 | 4 | -44 | 26 |
| R PCC | 1 | -1,701 | 10 | -46 | 28 |
| R Postcentral Gyrus | 2 | -2,312 | 38 | -38 | 60 |
| R Posterior-Medial Frontal | 1 | -2,463 | 14 | -32 | 60 |
| R Precuneus | 2 | -2,122 | 16 | -48 | 54 |
| R Rolandic Operculum | 1 | -2,093 | 50 | -4 | 16 |
| R Rolandic Operculum | 7 | -1,900 | 52 | -10 | 14 |
| R Rolandic Operculum | 2 | -1,900 | 48 | -10 | 18 |
| R Superior Medial Gyrus | 7 | -2,402 | 10 | 50 | 22 |
| R SupraMarginal Gyrus | 1 | -2,463 | 54 | -44 | 38 |
| R SupraMarginal Gyrus | 1 | -2,122 | 64 | -44 | 48 |
| R SupraMarginal Gyrus | 3 | -1,987 | 52 | -44 | 34 |
| **Note.** Table shows all maxima separated by more than 20 millimeter. Regions were automatically labeled using the SPM Anatomy Toolbox via bspmview. | | | | | |

| **Table S2. Full overview of** **negative correlations between whole brain accuracy matrix and Word Structure surviving TFCE corrections** | | | | | |
| --- | --- | --- | --- | --- | --- |
| *Location* | *Number of voxels (k)* | *z-value* | *MNI coordinates* | | |
|  |  |  | x | y | z |
| L ACC | 5 | -1,772 | -2 | 40 | 24 |
| L ACC | 1 | -1,772 | 2 | 36 | 30 |
| L Calcarine Gyrus | 1 | -3,662 | -12 | -68 | 10 |
| L Calcarine Gyrus | 2 | -2,942 | -22 | -62 | 12 |
| L Calcarine Gyrus | 1 | -2,942 | -26 | -60 | 16 |
| L Calcarine Gyrus | 1 | -2,550 | -24 | -74 | 12 |
| L Calcarine Gyrus | 1 | -2,104 | 0 | -82 | 16 |
| L Calcarine Gyrus | 1 | -2,104 | 2 | -74 | 16 |
| L Calcarine Gyrus | 1 | -2,104 | -2 | -80 | 18 |
| L Calcarine Gyrus | 2 | -2,104 | 2 | -74 | 24 |
| L Calcarine Gyrus | 2 | -1,796 | -8 | -64 | 14 |
| L Cuneus | 1 | -2,268 | -14 | -76 | 42 |
| L Fusiform Gyrus | 1 | -3,662 | -34 | -50 | -4 |
| L IFG (p. Opercularis) | 2 | -2,584 | -58 | 10 | 32 |
| L IFG (p. Opercularis) | 3 | -2,438 | -46 | 4 | 34 |
| L IFG (p. Opercularis) | 1 | -2,087 | -48 | 8 | 26 |
| L IFG (p. Opercularis) | 1 | -2,087 | -48 | 6 | 30 |
| L IFG (p. Triangularis) | 1 | -2,708 | -56 | 14 | 30 |
| L IFG (p. Triangularis) | 2 | -2,087 | -48 | 12 | 32 |
| L IFG (p. Triangularis) | 1 | -1,714 | -46 | 16 | 28 |
| L Linual Gyrus | 4 | -3,129 | 0 | -76 | 6 |
| L Linual Gyrus | 3 | -3,129 | -6 | -70 | 8 |
| L Linual Gyrus | 3 | -2,104 | 2 | -76 | 12 |
| L Linual Gyrus | 1 | -1,796 | -6 | -76 | 10 |
| L Linual Gyrus | 1 | -1,796 | -8 | -68 | 12 |
| L Middle Frontal Gyrus | 4 | -3,370 | -50 | 8 | 44 |
| L Middle Frontal Gyrus | 6 | -2,602 | -42 | 14 | 50 |
| L Middle Frontal Gyrus | 2 | -2,391 | -46 | 10 | 46 |
| L Middle Frontal Gyrus | 3 | -2,244 | -34 | 12 | 50 |
| L Middle Frontal Gyrus | 1 | -2,128 | -44 | 14 | 44 |
| L Middle Frontal Gyrus | 1 | -1,806 | -38 | 10 | 50 |
| L Middle Temporal Gyrus | 7 | -2,550 | -64 | -34 | 8 |
| L Middle Temporal Gyrus | 1 | -2,550 | -66 | -40 | 10 |
| L Middle Temporal Gyrus | 25 | -2,360 | -52 | -46 | 10 |
| L Middle Temporal Gyrus | 1 | -2,244 | -62 | -34 | 12 |
| L Middle Temporal Gyrus | 1 | -1,896 | -52 | -40 | 8 |
| L Precentral Gyrus | 2 | -3,370 | -54 | 4 | 42 |
| L Precentral Gyrus | 2 | -2,662 | -42 | -6 | 32 |
| L Precentral Gyrus | 3 | -2,229 | -40 | 0 | 38 |
| L Precuneus | 1 | -3,129 | -8 | -62 | 18 |
| L Precuneus | 1 | -2,898 | -6 | -46 | 66 |
| L Precuneus | 1 | -1,796 | -2 | -60 | 14 |
| L Precuneus | 1 | -1,796 | -6 | -60 | 22 |
| L Putamen | 1 | -2,602 | -22 | 4 | 16 |
| L Superior Medial Gyrus | 1 | -1,772 | -2 | 40 | 28 |
| L Superior Medial Gyrus | 1 | -1,772 | -6 | 42 | 34 |
| L Superior Medial Gyrus | 2 | -1,772 | 2 | 40 | 36 |
| L Superior Medial Gyrus | 1 | -1,772 | -2 | 40 | 36 |
| L Superior Occipital Gyrus | 1 | -2,268 | -18 | -74 | 44 |
| L Superior Occipital Gyrus | 1 | -2,268 | -18 | -78 | 46 |
| L Superior Temporal Gyrus | 6 | -2,360 | -56 | -44 | 20 |
| L Superior Temporal Gyrus | 8 | -2,360 | -62 | -52 | 22 |
| L Superior Temporal Gyrus | 1 | -1,784 | -64 | -40 | 18 |
| L Superior Temporal Gyrus | 1 | -1,784 | -60 | -48 | 20 |
| Location not in atlas | 1 | -3,662 | -22 | 36 | 10 |
| Location not in atlas | 5 | -2,942 | -28 | -54 | 16 |
| Location not in atlas | 3 | -2,942 | -26 | -58 | 20 |
| Location not in atlas | 2 | -2,942 | -26 | -46 | 20 |
| Location not in atlas | 2 | -2,942 | -28 | -50 | 22 |
| Location not in atlas | 3 | -2,942 | -24 | -52 | 24 |
| Location not in atlas | 1 | -2,942 | -26 | -50 | 28 |
| Location not in atlas | 1 | -2,898 | -44 | -16 | 34 |
| Location not in atlas | 1 | -2,584 | -22 | -6 | 40 |
| Location not in atlas | 4 | -2,566 | 38 | -70 | 12 |
| Location not in atlas | 1 | -2,490 | -68 | -40 | 20 |
| Location not in atlas | 9 | -2,438 | -40 | -46 | -2 |
| Location not in atlas | 1 | -2,438 | -34 | -44 | 0 |
| Location not in atlas | 1 | -2,438 | -42 | -56 | 6 |
| Location not in atlas | 24 | -2,438 | -32 | -44 | 10 |
| Location not in atlas | 1 | -2,438 | -32 | -46 | 14 |
| Location not in atlas | 2 | -2,360 | 32 | -24 | 4 |
| Location not in atlas | 3 | -2,360 | 38 | -34 | 8 |
| Location not in atlas | 14 | -2,360 | 26 | -30 | 10 |
| Location not in atlas | 1 | -2,360 | 24 | -28 | 12 |
| Location not in atlas | 1 | -2,360 | 28 | -32 | 16 |
| Location not in atlas | 1 | -2,360 | 26 | -28 | 16 |
| Location not in atlas | 3 | -2,360 | 26 | -40 | 18 |
| Location not in atlas | 1 | -2,360 | 28 | -28 | 20 |
| Location not in atlas | 2 | -2,360 | 30 | -34 | 22 |
| Location not in atlas | 3 | -2,360 | 26 | -44 | 26 |
| Location not in atlas | 2 | -2,360 | 24 | -40 | 28 |
| Location not in atlas | 1 | -2,360 | 14 | -40 | 30 |
| Location not in atlas | 2 | -2,360 | 18 | -38 | 30 |
| Location not in atlas | 1 | -2,360 | 12 | -36 | 30 |
| Location not in atlas | 1 | -2,360 | 30 | -48 | 32 |
| Location not in atlas | 1 | -2,360 | 24 | -38 | 32 |
| Location not in atlas | 1 | -2,360 | 22 | -46 | 34 |
| Location not in atlas | 1 | -2,360 | 12 | -40 | 34 |
| Location not in atlas | 5 | -2,360 | 14 | -38 | 36 |
| Location not in atlas | 21 | -2,360 | 22 | -42 | 42 |
| Location not in atlas | 1 | -2,360 | 14 | -30 | 42 |
| Location not in atlas | 4 | -2,360 | 16 | -40 | 44 |
| Location not in atlas | 1 | -2,294 | -12 | -16 | 62 |
| Location not in atlas | 1 | -2,285 | -32 | -8 | 42 |
| Location not in atlas | 2 | -2,200 | -30 | -26 | 22 |
| Location not in atlas | 3 | -2,076 | 48 | -30 | 32 |
| Location not in atlas | 7 | -2,076 | 38 | -30 | 32 |
| Location not in atlas | 4 | -2,076 | 38 | -26 | 34 |
| Location not in atlas | 3 | -2,076 | 42 | -24 | 36 |
| Location not in atlas | 2 | -2,076 | 46 | -34 | 38 |
| Location not in atlas | 2 | -2,076 | 36 | -22 | 38 |
| Location not in atlas | 3 | -2,076 | 36 | -18 | 42 |
| Location not in atlas | 7 | -2,076 | 38 | -24 | 44 |
| Location not in atlas | 2 | -2,076 | 36 | -14 | 44 |
| Location not in atlas | 1 | -2,076 | 32 | -16 | 52 |
| Location not in atlas | 9 | -2,020 | 34 | -70 | 32 |
| Location not in atlas | 4 | -2,020 | 38 | -66 | 32 |
| Location not in atlas | 1 | -1,974 | 36 | -76 | 6 |
| Location not in atlas | 1 | -1,970 | 34 | -30 | 36 |
| Location not in atlas | 1 | -1,952 | 34 | 40 | 6 |
| Location not in atlas | 4 | -1,952 | 42 | 4 | 26 |
| Location not in atlas | 1 | -1,867 | 42 | -30 | 6 |
| Location not in atlas | 1 | -1,829 | 26 | -22 | 12 |
| Location not in atlas | 1 | -1,822 | 34 | 6 | 8 |
| Location not in atlas | 1 | -1,822 | 30 | 16 | 16 |
| Location not in atlas | 3 | -1,822 | 22 | -4 | 20 |
| Location not in atlas | 2 | -1,822 | 30 | 10 | 20 |
| Location not in atlas | 3 | -1,822 | 26 | 10 | 20 |
| Location not in atlas | 4 | -1,822 | 22 | -10 | 22 |
| Location not in atlas | 1 | -1,822 | 34 | -6 | 22 |
| Location not in atlas | 1 | -1,822 | 30 | 4 | 22 |
| Location not in atlas | 1 | -1,822 | 28 | -12 | 24 |
| Location not in atlas | 1 | -1,822 | 28 | -4 | 24 |
| Location not in atlas | 1 | -1,822 | 32 | 0 | 24 |
| Location not in atlas | 1 | -1,822 | 32 | -8 | 26 |
| Location not in atlas | 1 | -1,822 | 28 | -8 | 26 |
| Location not in atlas | 2 | -1,822 | 30 | 6 | 26 |
| Location not in atlas | 1 | -1,822 | 30 | -10 | 28 |
| Location not in atlas | 4 | -1,772 | 20 | 34 | 24 |
| Location not in atlas | 1 | -1,772 | 22 | 18 | 26 |
| Location not in atlas | 7 | -1,772 | 30 | 20 | 26 |
| Location not in atlas | 1 | -1,772 | 18 | 28 | 26 |
| Location not in atlas | 2 | -1,772 | 22 | 36 | 28 |
| Location not in atlas | 1 | -1,772 | 18 | 38 | 28 |
| Location not in atlas | 3 | -1,772 | 16 | 14 | 32 |
| Location not in atlas | 9 | -1,772 | 20 | 28 | 32 |
| Location not in atlas | 6 | -1,772 | 20 | -4 | 34 |
| Location not in atlas | 1 | -1,772 | 16 | 10 | 34 |
| Location not in atlas | 5 | -1,772 | 24 | 12 | 34 |
| Location not in atlas | 1 | -1,772 | 28 | 8 | 36 |
| Location not in atlas | 1 | -1,772 | 16 | 4 | 38 |
| Location not in atlas | 1 | -1,772 | 12 | 4 | 38 |
| Location not in atlas | 2 | -1,772 | 14 | -2 | 40 |
| Location not in atlas | 1 | -1,772 | 24 | 0 | 40 |
| Location not in atlas | 2 | -1,772 | 22 | 6 | 40 |
| Location not in atlas | 2 | -1,772 | 22 | 10 | 40 |
| Location not in atlas | 11 | -1,772 | 16 | 22 | 40 |
| Location not in atlas | 3 | -1,772 | 16 | 4 | 42 |
| Location not in atlas | 1 | -1,772 | 18 | 16 | 48 |
| Location not in atlas | 1 | -1,745 | -34 | -48 | 6 |
| Location not in atlas | 1 | -1,736 | 34 | 2 | 26 |
| Location not in atlas | 1 | -1,698 | -24 | 6 | 20 |
| Location not in atlas | 1 | -1,698 | 32 | 30 | 22 |
| Location not in atlas | 1 | -1,672 | 24 | -2 | 24 |
| Location not in atlas | 1 | -1,662 | 24 | 16 | 28 |
| R ACC | 1 | -2,312 | 6 | 28 | 28 |
| R ACC | 1 | -1,772 | 10 | 36 | 18 |
| R ACC | 3 | -1,772 | 10 | 44 | 20 |
| R ACC | 1 | -1,772 | 12 | 34 | 24 |
| R ACC | 1 | -1,772 | 10 | 38 | 24 |
| R ACC | 2 | -1,772 | 14 | 40 | 24 |
| R ACC | 1 | -1,772 | 12 | 28 | 28 |
| R ACC | 1 | -1,772 | 14 | 38 | 28 |
| R ACC | 1 | -1,772 | 4 | 40 | 28 |
| R ACC | 1 | -1,772 | 8 | 42 | 28 |
| R ACC | 1 | -1,772 | 12 | 30 | 32 |
| R ACC | 2 | -1,772 | 14 | 34 | 32 |
| R ACC | 1 | -1,772 | 8 | 38 | 32 |
| R ACC | 1 | -1,772 | 4 | 40 | 32 |
| R ACC | 2 | -1,772 | 14 | 20 | 34 |
| R ACC | 3 | -1,772 | 6 | 34 | 34 |
| R ACC | 1 | -1,714 | 14 | 32 | 22 |
| R Angular Gyrus | 5 | -2,020 | 42 | -60 | 32 |
| R Angular Gyrus | 1 | -2,020 | 44 | -72 | 38 |
| R Angular Gyrus | 1 | -2,020 | 38 | -66 | 38 |
| R Angular Gyrus | 1 | -2,020 | 46 | -60 | 38 |
| R Angular Gyrus | 1 | -2,020 | 46 | -56 | 40 |
| R Angular Gyrus | 2 | -2,020 | 44 | -72 | 42 |
| R Angular Gyrus | 1 | -2,020 | 38 | -72 | 42 |
| R Angular Gyrus | 8 | -2,020 | 42 | -66 | 42 |
| R Angular Gyrus | 4 | -2,020 | 36 | -66 | 42 |
| R Angular Gyrus | 1 | -2,020 | 48 | -60 | 42 |
| R Angular Gyrus | 4 | -2,020 | 44 | -58 | 42 |
| R Angular Gyrus | 2 | -2,020 | 42 | -48 | 42 |
| R Angular Gyrus | 1 | -2,020 | 42 | -60 | 44 |
| R Angular Gyrus | 1 | -2,020 | 34 | -64 | 46 |
| R Angular Gyrus | 2 | -2,020 | 30 | -64 | 46 |
| R Angular Gyrus | 1 | -2,020 | 44 | -62 | 46 |
| R Angular Gyrus | 1 | -2,020 | 34 | -70 | 50 |
| R Angular Gyrus | 1 | -2,020 | 34 | -66 | 50 |
| R Angular Gyrus | 2 | -2,020 | 34 | -60 | 50 |
| R Angular Gyrus | 3 | -2,020 | 46 | -66 | 52 |
| R Angular Gyrus | 1 | -2,020 | 36 | -62 | 52 |
| R Angular Gyrus | 1 | -2,020 | 40 | -60 | 56 |
| R Calcarine Gyrus | 2 | -2,104 | 14 | -90 | 4 |
| R Calcarine Gyrus | 1 | -2,104 | 14 | -86 | 8 |
| R Calcarine Gyrus | 8 | -2,104 | 22 | -72 | 10 |
| R Calcarine Gyrus | 1 | -2,104 | 24 | -68 | 10 |
| R Calcarine Gyrus | 1 | -2,104 | 20 | -68 | 10 |
| R Calcarine Gyrus | 3 | -2,104 | 8 | -80 | 12 |
| R Calcarine Gyrus | 1 | -2,104 | 18 | -70 | 12 |
| R Calcarine Gyrus | 1 | -2,104 | 18 | -90 | 14 |
| R Calcarine Gyrus | 1 | -2,104 | 8 | -86 | 14 |
| R Calcarine Gyrus | 1 | -2,104 | 4 | -80 | 14 |
| R Calcarine Gyrus | 4 | -2,104 | 20 | -76 | 14 |
| R Calcarine Gyrus | 1 | -2,104 | 12 | -74 | 14 |
| R Calcarine Gyrus | 1 | -2,104 | 20 | -66 | 14 |
| R Calcarine Gyrus | 5 | -2,104 | 20 | -88 | 16 |
| R Calcarine Gyrus | 1 | -2,104 | 14 | -86 | 16 |
| R Calcarine Gyrus | 1 | -2,104 | 18 | -82 | 16 |
| R Calcarine Gyrus | 1 | -2,104 | 12 | -80 | 16 |
| R Calcarine Gyrus | 2 | -2,104 | 14 | -76 | 16 |
| R Calcarine Gyrus | 1 | -2,104 | 10 | -90 | 18 |
| R Calcarine Gyrus | 1 | -2,104 | 6 | -82 | 18 |
| R Calcarine Gyrus | 1 | -2,104 | 20 | -76 | 18 |
| R Calcarine Gyrus | 1 | -2,104 | 10 | -74 | 18 |
| R Calcarine Gyrus | 5 | -2,104 | 18 | -80 | 20 |
| R Calcarine Gyrus | 2 | -2,104 | 10 | -80 | 20 |
| R Calcarine Gyrus | 1 | -2,104 | 4 | -80 | 20 |
| R Calcarine Gyrus | 1 | -2,104 | 14 | -92 | 22 |
| R Calcarine Gyrus | 1 | -2,104 | 14 | -88 | 22 |
| R Calcarine Gyrus | 2 | -2,104 | 6 | -84 | 22 |
| R Calcarine Gyrus | 1 | -2,104 | 14 | -76 | 22 |
| R Calcarine Gyrus | 8 | -2,104 | 14 | -70 | 22 |
| R Caudate Nucleus | 3 | -1,772 | 22 | 14 | 22 |
| R Caudate Nucleus | 1 | -1,698 | 20 | 2 | 22 |
| R Cerebelum (VI) | 4 | -2,104 | 16 | -82 | -10 |
| R Cerebelum (VI) | 1 | -2,104 | 14 | -78 | -10 |
| R Cuneus | 1 | -2,104 | 6 | -92 | 20 |
| R Cuneus | 1 | -2,104 | 4 | -78 | 26 |
| R Cuneus | 1 | -2,104 | 4 | -82 | 28 |
| R Fusiform Gyrus | 1 | -2,994 | 26 | -80 | 2 |
| R Fusiform Gyrus | 2 | -2,104 | 26 | -82 | -2 |
| R IFG (p. Opercularis) | 6 | -2,011 | 56 | 6 | 12 |
| R IFG (p. Opercularis) | 3 | -2,011 | 58 | 10 | 16 |
| R IFG (p. Opercularis) | 2 | -2,011 | 60 | 6 | 20 |
| R IFG (p. Opercularis) | 2 | -2,011 | 60 | 8 | 24 |
| R IFG (p. Opercularis) | 7 | -1,952 | 42 | 10 | 18 |
| R IFG (p. Opercularis) | 3 | -1,952 | 58 | 16 | 36 |
| R IFG (p. Opercularis) | 1 | -1,867 | 58 | 10 | 28 |
| R IFG (p. Opercularis) | 1 | -1,772 | 30 | 6 | 34 |
| R IFG (p. Opercularis) | 1 | -1,769 | 50 | 6 | 22 |
| R IFG (p. Opercularis) | 2 | -1,725 | 50 | 8 | 28 |
| R IFG (p. Triangularis) | 7 | -1,952 | 40 | 38 | 6 |
| R IFG (p. Triangularis) | 1 | -1,952 | 52 | 20 | 8 |
| R IFG (p. Triangularis) | 4 | -1,952 | 56 | 24 | 8 |
| R IFG (p. Triangularis) | 2 | -1,952 | 42 | 24 | 8 |
| R IFG (p. Triangularis) | 1 | -1,952 | 48 | 36 | 8 |
| R IFG (p. Triangularis) | 1 | -1,952 | 50 | 22 | 10 |
| R IFG (p. Triangularis) | 11 | -1,952 | 46 | 22 | 10 |
| R IFG (p. Triangularis) | 1 | -1,952 | 46 | 30 | 10 |
| R IFG (p. Triangularis) | 3 | -1,952 | 54 | 32 | 10 |
| R IFG (p. Triangularis) | 2 | -1,952 | 52 | 38 | 12 |
| R IFG (p. Triangularis) | 8 | -1,952 | 38 | 18 | 14 |
| R IFG (p. Triangularis) | 7 | -1,952 | 54 | 36 | 14 |
| R IFG (p. Triangularis) | 2 | -1,952 | 48 | 20 | 16 |
| R IFG (p. Triangularis) | 1 | -1,952 | 56 | 34 | 16 |
| R IFG (p. Triangularis) | 1 | -1,952 | 40 | 28 | 18 |
| R IFG (p. Triangularis) | 4 | -1,952 | 38 | 16 | 20 |
| R IFG (p. Triangularis) | 4 | -1,952 | 52 | 22 | 20 |
| R IFG (p. Triangularis) | 3 | -1,952 | 46 | 32 | 20 |
| R IFG (p. Triangularis) | 1 | -1,952 | 52 | 28 | 22 |
| R IFG (p. Triangularis) | 9 | -1,952 | 52 | 14 | 28 |
| R IFG (p. Triangularis) | 5 | -1,952 | 56 | 20 | 30 |
| R IFG (p. Triangularis) | 8 | -1,952 | 52 | 30 | 30 |
| R IFG (p. Triangularis) | 1 | -1,952 | 44 | 30 | 30 |
| R IFG (p. Triangularis) | 1 | -1,952 | 40 | 28 | 34 |
| R IFG (p. Triangularis) | 1 | -1,867 | 50 | 20 | 32 |
| R IFG (p. Triangularis) | 1 | -1,796 | 50 | 12 | 30 |
| R IFG (p. Triangularis) | 2 | -1,769 | 56 | 22 | 24 |
| R IFG (p. Triangularis) | 1 | -1,698 | 52 | 28 | 10 |
| R Inferior Occipital Gyrus | 3 | -2,104 | 26 | -92 | -6 |
| R Inferior Occipital Gyrus | 1 | -2,104 | 28 | -98 | -2 |
| R Inferior Occipital Gyrus | 1 | -2,104 | 26 | -96 | 2 |
| R Inferior Parietal Lobule | 1 | -2,020 | 48 | -54 | 44 |
| R Inferior Parietal Lobule | 2 | -2,020 | 38 | -54 | 46 |
| R Inferior Parietal Lobule | 2 | -2,020 | 48 | -58 | 48 |
| R Inferior Parietal Lobule | 4 | -2,020 | 46 | -54 | 48 |
| R Inferior Parietal Lobule | 1 | -2,020 | 42 | -56 | 50 |
| R Inferior Parietal Lobule | 7 | -2,020 | 48 | -48 | 52 |
| R Inferior Parietal Lobule | 4 | -2,020 | 50 | -56 | 54 |
| R Inferior Parietal Lobule | 2 | -2,020 | 42 | -56 | 54 |
| R Inferior Parietal Lobule | 1 | -2,020 | 44 | -54 | 58 |
| R Inferior Parietal Lobule | 2 | -2,020 | 38 | -58 | 60 |
| R Insula Lobe | 1 | -2,584 | 38 | 0 | 10 |
| R Insula Lobe | 1 | -2,584 | 34 | 8 | 16 |
| R Insula Lobe | 10 | -2,360 | 38 | -14 | 4 |
| R Insula Lobe | 5 | -1,952 | 44 | 20 | 4 |
| R Insula Lobe | 1 | -1,952 | 36 | 18 | 10 |
| R Insula Lobe | 1 | -1,952 | 32 | 22 | 10 |
| R Insula Lobe | 2 | -1,829 | 36 | -20 | 12 |
| R Insula Lobe | 1 | -1,822 | 38 | 4 | 8 |
| R Insula Lobe | 1 | -1,822 | 36 | 6 | 12 |
| R Insula Lobe | 2 | -1,822 | 32 | 10 | 12 |
| R Insula Lobe | 1 | -1,822 | 34 | 14 | 14 |
| R Insula Lobe | 5 | -1,778 | 50 | -6 | 6 |
| R Insula Lobe | 1 | -1,778 | 44 | 2 | 10 |
| R Insula Lobe | 4 | -1,778 | 44 | -2 | 14 |
| R Linual Gyrus | 2 | -2,104 | 10 | -88 | -8 |
| R Linual Gyrus | 1 | -2,104 | 20 | -88 | -6 |
| R Linual Gyrus | 1 | -2,104 | 6 | -84 | -6 |
| R Linual Gyrus | 1 | -2,104 | 14 | -78 | -6 |
| R Linual Gyrus | 1 | -2,104 | 6 | -90 | -4 |
| R Linual Gyrus | 1 | -2,104 | 24 | -88 | -4 |
| R Linual Gyrus | 1 | -2,104 | 14 | -72 | -4 |
| R Linual Gyrus | 1 | -2,104 | 22 | -92 | -2 |
| R Linual Gyrus | 1 | -2,104 | 16 | -80 | -2 |
| R Linual Gyrus | 2 | -2,104 | 10 | -76 | -2 |
| R Linual Gyrus | 4 | -2,104 | 24 | -88 | 0 |
| R Linual Gyrus | 2 | -2,104 | 20 | -86 | 0 |
| R Linual Gyrus | 8 | -2,104 | 8 | -80 | 2 |
| R Linual Gyrus | 2 | -2,104 | 10 | -76 | 2 |
| R Linual Gyrus | 1 | -2,104 | 6 | -72 | 2 |
| R Linual Gyrus | 1 | -2,104 | 14 | -70 | 2 |
| R Linual Gyrus | 1 | -2,104 | 12 | -84 | 4 |
| R Linual Gyrus | 3 | -1,819 | 2 | -82 | 2 |
| R MCC | 1 | -2,360 | 12 | -40 | 38 |
| R MCC | 3 | -2,360 | 8 | -24 | 38 |
| R MCC | 1 | -2,360 | 12 | -32 | 40 |
| R MCC | 2 | -2,360 | 8 | -30 | 40 |
| R MCC | 1 | -2,360 | 12 | -28 | 40 |
| R MCC | 1 | -2,360 | 8 | -38 | 42 |
| R MCC | 1 | -2,360 | 10 | -34 | 42 |
| R MCC | 2 | -2,360 | 4 | -32 | 42 |
| R MCC | 3 | -2,360 | 4 | -38 | 46 |
| R MCC | 3 | -2,360 | 12 | -36 | 46 |
| R MCC | 1 | -2,360 | 12 | -32 | 48 |
| R MCC | 1 | -1,772 | 14 | 16 | 36 |
| R MCC | 3 | -1,772 | 10 | 20 | 36 |
| R MCC | 3 | -1,772 | 12 | 24 | 36 |
| R MCC | 6 | -1,772 | 10 | 28 | 36 |
| R MCC | 2 | -1,772 | 12 | 38 | 36 |
| R MCC | 2 | -1,772 | 6 | 38 | 36 |
| R MCC | 4 | -1,772 | 14 | 10 | 38 |
| R MCC | 1 | -1,772 | 10 | 20 | 40 |
| R MCC | 2 | -1,772 | 6 | 32 | 40 |
| R MCC | 1 | -1,772 | 10 | 14 | 42 |
| R MCC | 1 | -1,772 | 12 | 22 | 42 |
| R MCC | 1 | -1,772 | 12 | 28 | 42 |
| R MCC | 5 | -1,772 | 6 | 28 | 42 |
| R MCC | 2 | -1,772 | 12 | 16 | 44 |
| R MCC | 6 | -1,772 | 10 | 8 | 46 |
| R Middle Frontal Gyrus | 11 | -1,952 | 46 | 42 | 8 |
| R Middle Frontal Gyrus | 6 | -1,952 | 34 | 44 | 8 |
| R Middle Frontal Gyrus | 3 | -1,952 | 34 | 48 | 14 |
| R Middle Frontal Gyrus | 1 | -1,952 | 40 | 52 | 14 |
| R Middle Frontal Gyrus | 2 | -1,952 | 48 | 44 | 16 |
| R Middle Frontal Gyrus | 1 | -1,952 | 44 | 36 | 18 |
| R Middle Frontal Gyrus | 1 | -1,952 | 50 | 40 | 18 |
| R Middle Frontal Gyrus | 1 | -1,952 | 38 | 34 | 22 |
| R Middle Frontal Gyrus | 1 | -1,952 | 40 | 38 | 22 |
| R Middle Frontal Gyrus | 1 | -1,952 | 46 | 42 | 22 |
| R Middle Frontal Gyrus | 4 | -1,952 | 46 | 46 | 22 |
| R Middle Frontal Gyrus | 2 | -1,952 | 36 | 32 | 24 |
| R Middle Frontal Gyrus | 4 | -1,952 | 46 | 38 | 24 |
| R Middle Frontal Gyrus | 1 | -1,952 | 50 | 42 | 24 |
| R Middle Frontal Gyrus | 2 | -1,952 | 44 | 36 | 28 |
| R Middle Frontal Gyrus | 1 | -1,952 | 44 | 44 | 28 |
| R Middle Frontal Gyrus | 8 | -1,952 | 38 | 32 | 30 |
| R Middle Frontal Gyrus | 1 | -1,952 | 48 | 40 | 30 |
| R Middle Frontal Gyrus | 1 | -1,952 | 44 | 30 | 34 |
| R Middle Frontal Gyrus | 1 | -1,952 | 44 | 36 | 34 |
| R Middle Frontal Gyrus | 1 | -1,952 | 46 | 38 | 36 |
| R Middle Frontal Gyrus | 2 | -1,952 | 40 | 26 | 38 |
| R Middle Frontal Gyrus | 2 | -1,952 | 42 | 32 | 38 |
| R Middle Frontal Gyrus | 1 | -1,952 | 42 | 28 | 42 |
| R Middle Frontal Gyrus | 1 | -1,952 | 36 | 28 | 42 |
| R Middle Frontal Gyrus | 1 | -1,952 | 36 | 32 | 42 |
| R Middle Frontal Gyrus | 1 | -1,772 | 22 | 42 | 32 |
| R Middle Frontal Gyrus | 1 | -1,772 | 22 | 20 | 44 |
| R Middle Frontal Gyrus | 1 | -1,772 | 34 | 10 | 48 |
| R Middle Frontal Gyrus | 11 | -1,772 | 32 | 16 | 48 |
| R Middle Frontal Gyrus | 1 | -1,772 | 24 | 2 | 52 |
| R Middle Frontal Gyrus | 1 | -1,772 | 26 | 6 | 54 |
| R Middle Frontal Gyrus | 1 | -1,769 | 44 | 48 | 14 |
| R Middle Frontal Gyrus | 1 | -1,725 | 38 | 40 | 10 |
| R Middle Occipital Gyrus | 3 | -2,237 | 40 | -80 | 6 |
| R Middle Occipital Gyrus | 1 | -2,172 | 40 | -74 | 8 |
| R Middle Occipital Gyrus | 1 | -2,020 | 44 | -76 | 30 |
| R Middle Occipital Gyrus | 1 | -2,020 | 38 | -76 | 30 |
| R Middle Occipital Gyrus | 5 | -2,020 | 46 | -72 | 30 |
| R Middle Occipital Gyrus | 1 | -2,020 | 42 | -78 | 32 |
| R Middle Occipital Gyrus | 1 | -2,020 | 36 | -72 | 36 |
| R Middle Occipital Gyrus | 1 | -2,020 | 34 | -76 | 38 |
| R Middle Occipital Gyrus | 12 | -2,020 | 32 | -70 | 44 |
| R Middle Occipital Gyrus | 2 | -1,900 | 42 | -80 | 22 |
| R Middle Temporal Gyrus | 1 | -2,708 | 44 | -72 | 16 |
| R Middle Temporal Gyrus | 1 | -2,166 | 46 | -74 | 14 |
| R Middle Temporal Gyrus | 1 | -2,020 | 44 | -76 | 26 |
| R Middle Temporal Gyrus | 16 | -2,020 | 46 | -70 | 26 |
| R Middle Temporal Gyrus | 1 | -2,020 | 40 | -72 | 28 |
| R Middle Temporal Gyrus | 1 | -1,944 | 44 | -72 | 12 |
| R Middle Temporal Gyrus | 1 | -1,659 | 52 | -66 | 22 |
| R Pallidum | 18 | -2,360 | 28 | -10 | 4 |
| R Postcentral Gyrus | 33 | -2,076 | 52 | -16 | 36 |
| R Postcentral Gyrus | 1 | -2,076 | 44 | -18 | 40 |
| R Postcentral Gyrus | 1 | -2,076 | 42 | -28 | 48 |
| R Postcentral Gyrus | 4 | -2,076 | 60 | -16 | 50 |
| R Postcentral Gyrus | 1 | -2,076 | 60 | -22 | 52 |
| R Postcentral Gyrus | 5 | -2,076 | 60 | -26 | 54 |
| R Postcentral Gyrus | 9 | -2,011 | 66 | -2 | 24 |
| R Postcentral Gyrus | 1 | -1,904 | 58 | -20 | 50 |
| R Postcentral Gyrus | 1 | -1,893 | 58 | -24 | 50 |
| R Postcentral Gyrus | 1 | -1,781 | 50 | -12 | 38 |
| R Postcentral Gyrus | 1 | -1,701 | 58 | -18 | 46 |
| R Precentral Gyrus | 2 | -2,076 | 42 | -16 | 42 |
| R Precentral Gyrus | 1 | -2,076 | 36 | -4 | 44 |
| R Precentral Gyrus | 1 | -2,076 | 46 | -10 | 46 |
| R Precentral Gyrus | 10 | -2,076 | 40 | -6 | 46 |
| R Precentral Gyrus | 10 | -2,076 | 52 | 8 | 48 |
| R Precentral Gyrus | 1 | -2,076 | 32 | -20 | 50 |
| R Precentral Gyrus | 1 | -2,076 | 38 | -8 | 50 |
| R Precentral Gyrus | 1 | -2,076 | 44 | 0 | 50 |
| R Precentral Gyrus | 2 | -2,076 | 38 | -16 | 52 |
| R Precentral Gyrus | 1 | -2,076 | 48 | -14 | 52 |
| R Precentral Gyrus | 3 | -2,076 | 42 | -12 | 52 |
| R Precentral Gyrus | 6 | -2,076 | 38 | -12 | 52 |
| R Precentral Gyrus | 1 | -2,076 | 46 | -10 | 52 |
| R Precentral Gyrus | 1 | -2,076 | 40 | -2 | 52 |
| R Precentral Gyrus | 2 | -2,076 | 48 | -18 | 54 |
| R Precentral Gyrus | 1 | -2,076 | 50 | -10 | 54 |
| R Precentral Gyrus | 1 | -2,076 | 30 | -8 | 54 |
| R Precentral Gyrus | 3 | -2,076 | 44 | 0 | 54 |
| R Precentral Gyrus | 1 | -2,076 | 52 | -16 | 56 |
| R Precentral Gyrus | 5 | -2,076 | 46 | -8 | 56 |
| R Precentral Gyrus | 3 | -2,076 | 44 | -20 | 58 |
| R Precentral Gyrus | 2 | -2,076 | 38 | -20 | 60 |
| R Precentral Gyrus | 1 | -2,076 | 46 | -14 | 60 |
| R Precentral Gyrus | 1 | -2,076 | 42 | -16 | 62 |
| R Precentral Gyrus | 1 | -2,076 | 40 | -22 | 64 |
| R Precentral Gyrus | 3 | -2,076 | 36 | -18 | 64 |
| R Precuneus | 3 | -2,360 | 12 | -44 | 46 |
| R Putamen | 1 | -3,662 | 26 | 6 | 14 |
| R Putamen | 4 | -2,360 | 36 | -6 | 4 |
| R Putamen | 2 | -2,360 | 32 | -4 | 4 |
| R Putamen | 1 | -2,360 | 30 | -20 | 12 |
| R Putamen | 6 | -1,822 | 30 | 0 | 16 |
| R Putamen | 1 | -1,822 | 26 | 4 | 18 |
| R Putamen | 1 | -1,822 | 30 | -6 | 20 |
| R Rolandic Operculum | 2 | -2,076 | 52 | -32 | 28 |
| R Rolandic Operculum | 1 | -2,076 | 52 | -26 | 28 |
| R Rolandic Operculum | 2 | -2,011 | 62 | 6 | 8 |
| R Rolandic Operculum | 14 | -1,952 | 52 | 2 | 22 |
| R Rolandic Operculum | 3 | -1,778 | 54 | -6 | 12 |
| R Rolandic Operculum | 1 | -1,778 | 48 | -2 | 12 |
| R Rolandic Operculum | 3 | -1,778 | 46 | -10 | 14 |
| R Rolandic Operculum | 1 | -1,778 | 46 | -12 | 18 |
| R Rolandic Operculum | 1 | -1,778 | 48 | 0 | 18 |
| R Rolandic Operculum | 3 | -1,778 | 46 | -16 | 20 |
| R Rolandic Operculum | 5 | -1,778 | 48 | -20 | 22 |
| R Rolandic Operculum | 1 | -1,778 | 52 | -18 | 28 |
| R Superior Frontal Gyrus | 1 | -1,952 | 28 | 44 | 14 |
| R Superior Frontal Gyrus | 1 | -1,772 | 20 | 40 | 30 |
| R Superior Frontal Gyrus | 1 | -1,772 | 14 | 36 | 38 |
| R Superior Frontal Gyrus | 1 | -1,772 | 14 | 32 | 40 |
| R Superior Frontal Gyrus | 1 | -1,772 | 16 | 30 | 42 |
| R Superior Frontal Gyrus | 2 | -1,772 | 24 | 16 | 46 |
| R Superior Frontal Gyrus | 9 | -1,772 | 20 | 4 | 56 |
| R Superior Medial Gyrus | 1 | -1,772 | 6 | 48 | 22 |
| R Superior Medial Gyrus | 2 | -1,772 | 4 | 52 | 22 |
| R Superior Medial Gyrus | 2 | -1,772 | 8 | 54 | 22 |
| R Superior Medial Gyrus | 2 | -1,772 | 6 | 52 | 26 |
| R Superior Medial Gyrus | 3 | -1,772 | 10 | 48 | 28 |
| R Superior Medial Gyrus | 2 | -1,772 | 12 | 54 | 28 |
| R Superior Medial Gyrus | 1 | -1,772 | 8 | 46 | 30 |
| R Superior Medial Gyrus | 1 | -1,772 | 10 | 44 | 32 |
| R Superior Medial Gyrus | 1 | -1,772 | 8 | 32 | 44 |
| R Superior Medial Gyrus | 4 | -1,772 | 12 | 24 | 46 |
| R Superior Medial Gyrus | 1 | -1,772 | 10 | 30 | 46 |
| R Superior Medial Gyrus | 1 | -1,772 | 8 | 22 | 50 |
| R Superior Temporal Gyrus | 6 | -2,360 | 46 | -28 | 8 |
| R Superior Temporal Gyrus | 1 | -2,076 | 58 | -36 | 20 |
| R Superior Temporal Gyrus | 1 | -2,076 | 60 | -28 | 22 |
| R Superior Temporal Gyrus | 1 | -2,076 | 62 | -32 | 24 |
| R Superior Temporal Gyrus | 1 | -1,778 | 52 | -10 | 8 |
| R SupraMarginal Gyrus | 1 | -2,076 | 54 | -32 | 24 |
| R SupraMarginal Gyrus | 2 | -2,076 | 52 | -28 | 34 |
| R SupraMarginal Gyrus | 1 | -2,076 | 40 | -28 | 44 |
| R SupraMarginal Gyrus | 3 | -2,076 | 62 | -26 | 46 |
| R SupraMarginal Gyrus | 4 | -2,020 | 48 | -38 | 36 |
| R SupraMarginal Gyrus | 1 | -2,020 | 46 | -42 | 44 |
| R SupraMarginal Gyrus | 1 | -2,020 | 54 | -44 | 46 |
| R SupraMarginal Gyrus | 2 | -2,020 | 42 | -44 | 46 |
| R SupraMarginal Gyrus | 1 | -2,020 | 52 | -50 | 48 |
| R SupraMarginal Gyrus | 1 | -2,020 | 58 | -44 | 48 |
| R SupraMarginal Gyrus | 1 | -2,020 | 50 | -44 | 48 |
| R SupraMarginal Gyrus | 2 | -2,020 | 52 | -46 | 50 |
